# Supplementary material for: Quantitative analysis of vitamin D and its main metabolites in human milk by supercritical fluid chromatography coupled to tandem mass spectrometry
Source: PubMed Central journal article supplement (PMC6992569; doi:10.1007/s00216-019-02248-5), 2019-12-12
Supplement: 216_2019_2248_MOESM1_ESM.pdf [file 216_2019_2248_MOESM1_ESM.pdf]

## **Analytical and Bioanalytical Chemistry**

### **Electronic Supplementary Material**

#### **Quantitative analysis of vitamin D and its main metabolites in human milk by supercritical fluid chromatography coupled to tandem mass spectrometry**

J. M. Oberson, S. Bénet, K. Redeuil, E. Campos Giménez

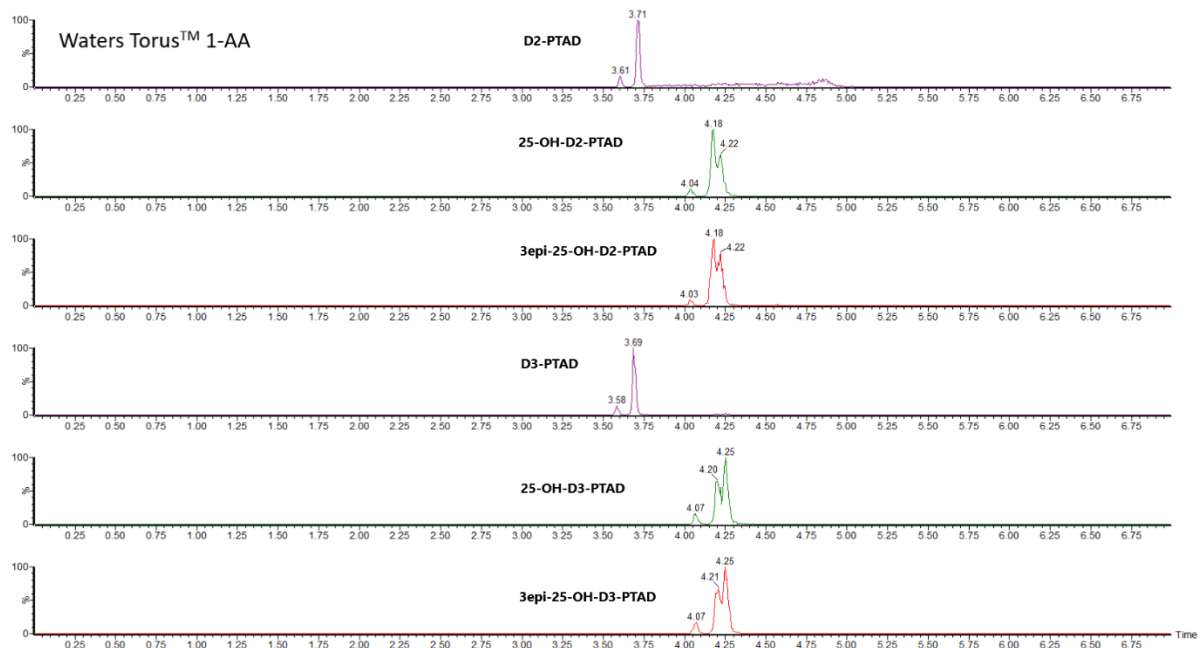

**Fig. S1** Chromatogram obtained during column screening on column 1: Waters Torus™ 1-AA, 3 mm x 100 mm, 1.8  $\mu$ m. Injection of PTAD-derivatized individual solutions (100 ng/mL, 3  $\mu$ L). Gradient elution, methanol:water (98:2) containing 10 mM ammonium formate into carbon dioxide. Retention time in minutes

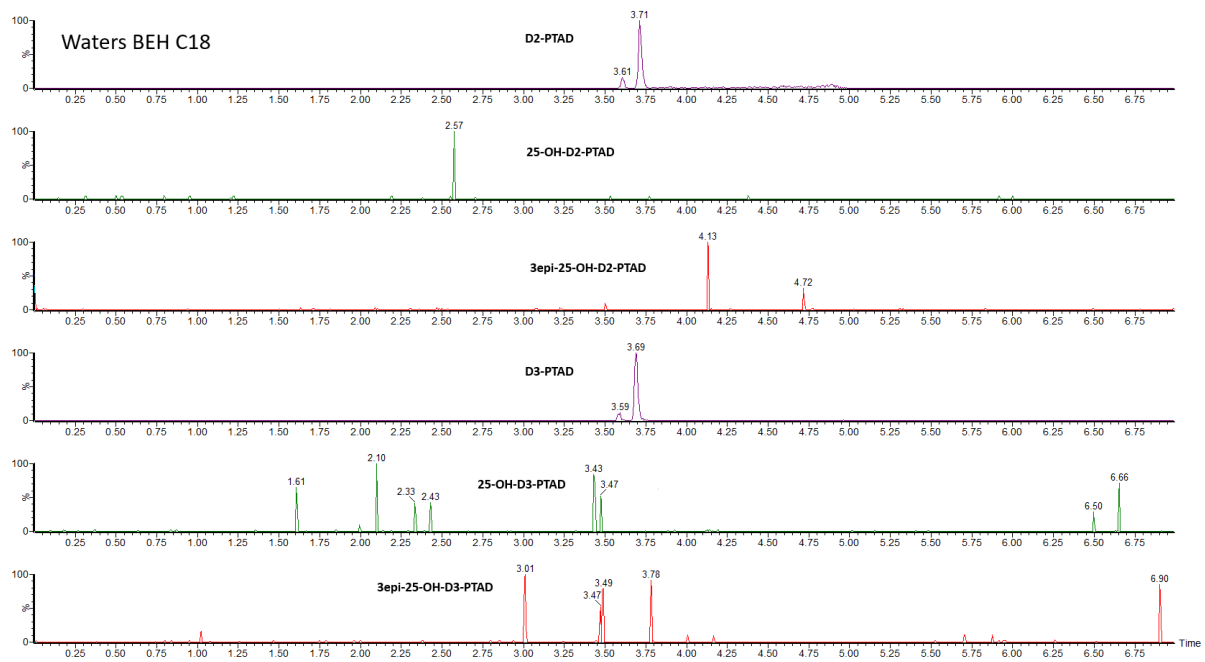

**Fig. S2** Chromatogram obtained during column screening on column 2: Waters BEH C18, 3 mm x 100 mm, 1.7  $\mu$ m. Injection of PTAD-derivatized individual solutions (100 ng/mL, 3  $\mu$ L). Gradient elution, methanol:water (98:2) containing 10 mM ammonium formate into carbon dioxide. Retention time in minutes

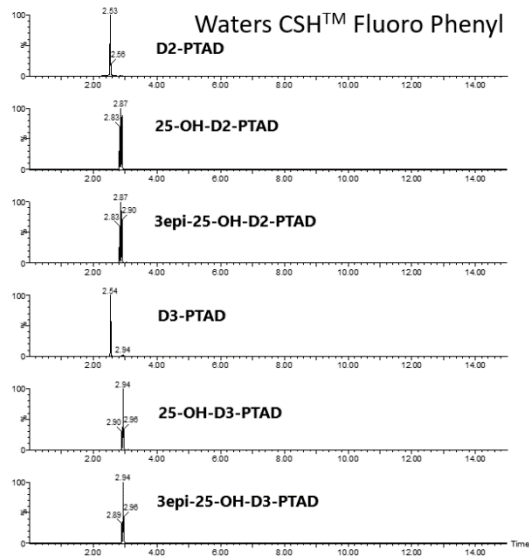

**Fig. S3** Chromatogram obtained during column screening on column 3: Waters CSH™ Fluoro Phenyl, 3 mm x 100 mm, 1.7  $\mu$ m. Injection of PTAD-derivatized individual solutions (100 ng/mL, 3  $\mu$ L). Gradient elution, methanol:water (98:2) containing 10 mM ammonium formate into carbon dioxide. Retention time in minutes

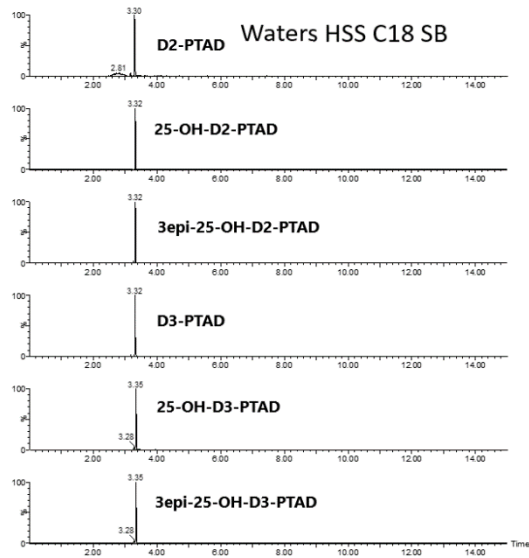

**Fig. S4** Chromatogram obtained during column screening on column 4: Waters HSS C18 SB, 3 mm x 100 mm, 1.8  $\mu$ m. Injection of PTAD-derivatized individual solutions (100 ng/mL, 3  $\mu$ L). Gradient elution, methanol:water (98:2) containing 10 mM ammonium formate into carbon dioxide. Retention time in minutes

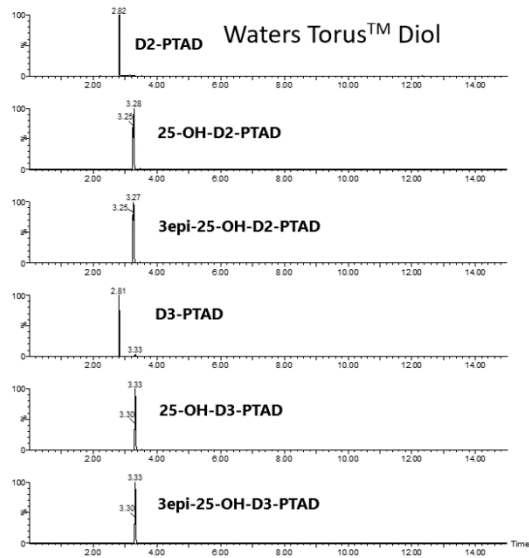

**Fig. S5** Chromatogram obtained during column screening on column 5: Waters Torus™ Diol, 3 mm x 100 mm, 1.7  $\mu$ m. Injection of PTAD-derivatized individual solutions (100 ng/mL, 3  $\mu$ L). Gradient elution, methanol:water (98:2) containing 10 mM ammonium formate into carbon dioxide. Retention time in minutes

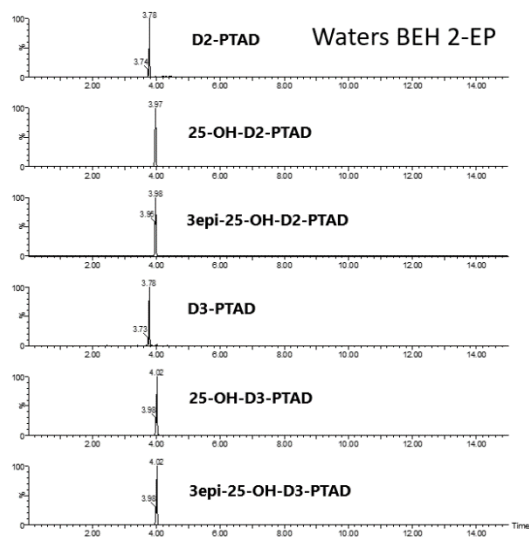

**Fig. S6** Chromatogram obtained during column screening on column 6: Waters BEH 2-EP, 3 mm x 100 mm, 1.7  $\mu$ m. Injection of PTAD-derivatized individual solutions (100 ng/mL, 3  $\mu$ L). Gradient elution, methanol:water (98:2) containing 10 mM ammonium formate into carbon dioxide. Retention time in minutes

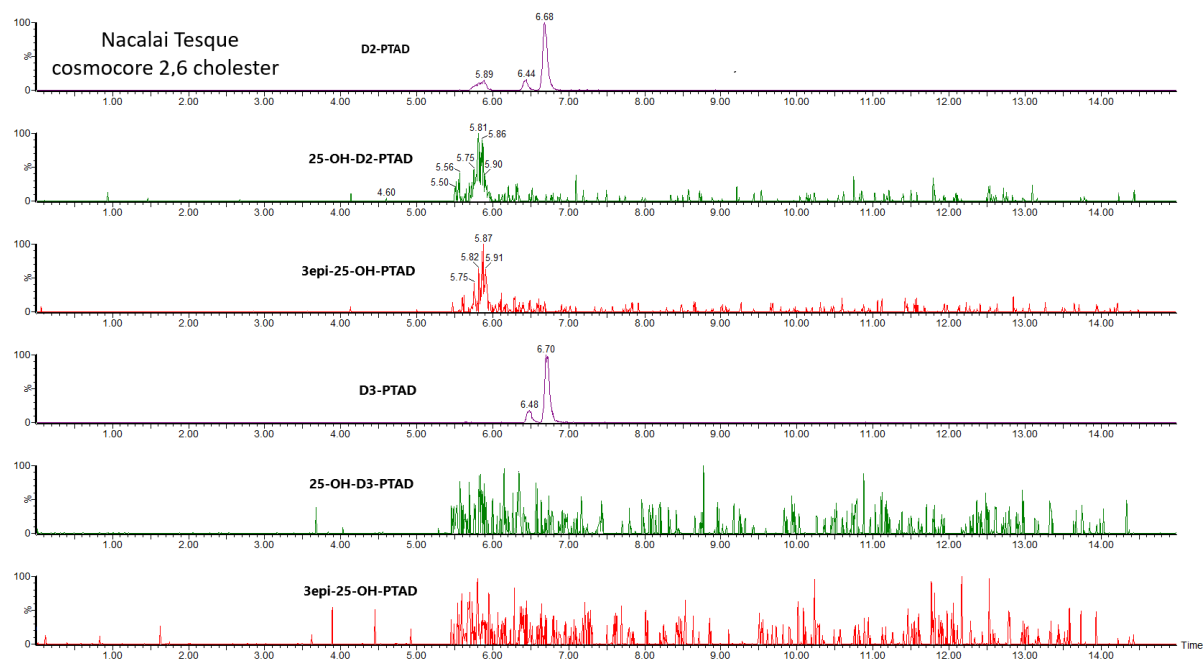

**Fig. S7** Chromatogram obtained during column screening on column 7: Nacalai Tesque Cosmocore 2,6 cholesterol, 2.1 mm x 150 mm, 2.6  $\mu$ m. Injection of PTAD-derivatized individual solutions (100 ng/mL, 3  $\mu$ L). Gradient elution, methanol:water (98:2) containing 10 mM ammonium formate into carbon dioxide. Retention time in minutes



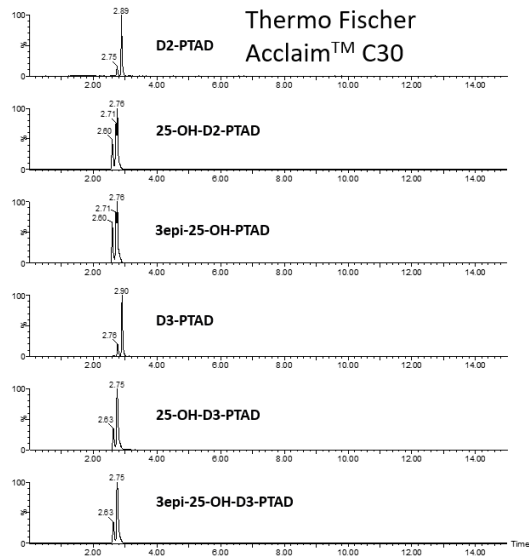

**Fig. S8** Chromatogram obtained during column screening on column 8: Thermo Fischer Acclaim™ C30, 2.1 mm x 150 mm, 3  $\mu$ m. Injection of PTAD-derivatized individual solutions (100 ng/mL, 3  $\mu$ L). Gradient elution, methanol:water (98:2) containing 10 mM ammonium formate into carbon dioxide. Retention time in minutes

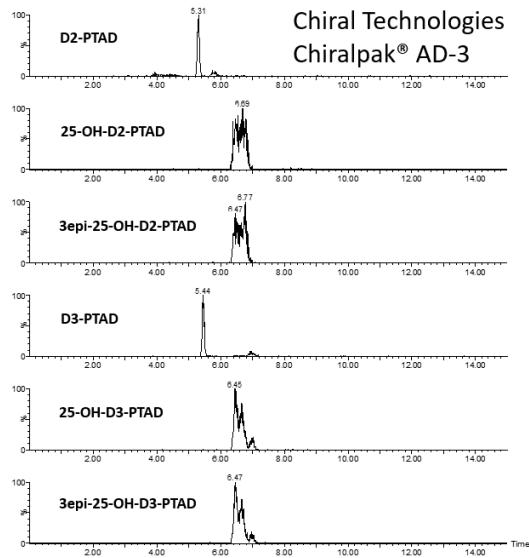

**Fig. S9** Chromatogram obtained during column screening on column 9: Chiral Technologies Chiralpak® AD-3, 4.6 mm x 150 mm, 3  $\mu$ m. Injection of PTAD-derivatized individual solutions (100 ng/mL, 3  $\mu$ L). Gradient elution, methanol:water (98:2) containing 10 mM ammonium formate into carbon dioxide. Retention time in minutes
